# Supplementary material for: Establishment of a pancreatic adenocarcinoma molecular gradient (PAMG) that predicts the clinical outcome of pancreatic cancer
Source: PubMed Central journal article supplement — eBioMedicine. 2020 Jul 3;57:102858. doi: 10.1016/j.ebiom.2020.102858 (PMC7334821; doi:10.1016/j.ebiom.2020.102858), 2020-07-03
Supplement: mmc3.pdf [file mmc3.pdf]

**a**

| Representative PDX | PDAC039T                                                                                                        | PDAC054T                                                                                                        | PDAC024T                                                                                                                             | PDAC016T                                                                                                              | PDAC071T                                                                                                              |
|--------------------|-----------------------------------------------------------------------------------------------------------------|-----------------------------------------------------------------------------------------------------------------|--------------------------------------------------------------------------------------------------------------------------------------|-----------------------------------------------------------------------------------------------------------------------|-----------------------------------------------------------------------------------------------------------------------|
| Class              | I                                                                                                               | II                                                                                                              | III                                                                                                                                  | IV                                                                                                                    | V                                                                                                                     |
| Differentiation    | Poor                                                                                                            |                                                                                                                 | Moderately                                                                                                                           | well                                                                                                                  |                                                                                                                       |
| Proportion         | 10.53%                                                                                                          | 6.58%                                                                                                           | 15.79%                                                                                                                               | 50.00%                                                                                                                | 17.11%                                                                                                                |
| Description        | <ul style="list-style-type: none"> <li>&gt;0,5 nucleo-cytoplasmic ratio</li> <li>&gt;5 mitoses/10HPF</li> </ul> | <ul style="list-style-type: none"> <li>&lt;0,5 nucleo-cytoplasmic ratio</li> <li>&lt;5 mitoses/10HPF</li> </ul> | <ul style="list-style-type: none"> <li>&lt;0,5 nucleo-cytoplasmic ratio</li> <li>+ Nuclear atypia</li> <li>&gt;50% glands</li> </ul> | <ul style="list-style-type: none"> <li>&gt;95% glands</li> <li>2-5 mitoses/10HPF</li> <li>Secreting Glands</li> </ul> | <ul style="list-style-type: none"> <li>&gt;95% glands</li> <li>0-1 mitoses/10HPF</li> <li>Secreting Glands</li> </ul> |

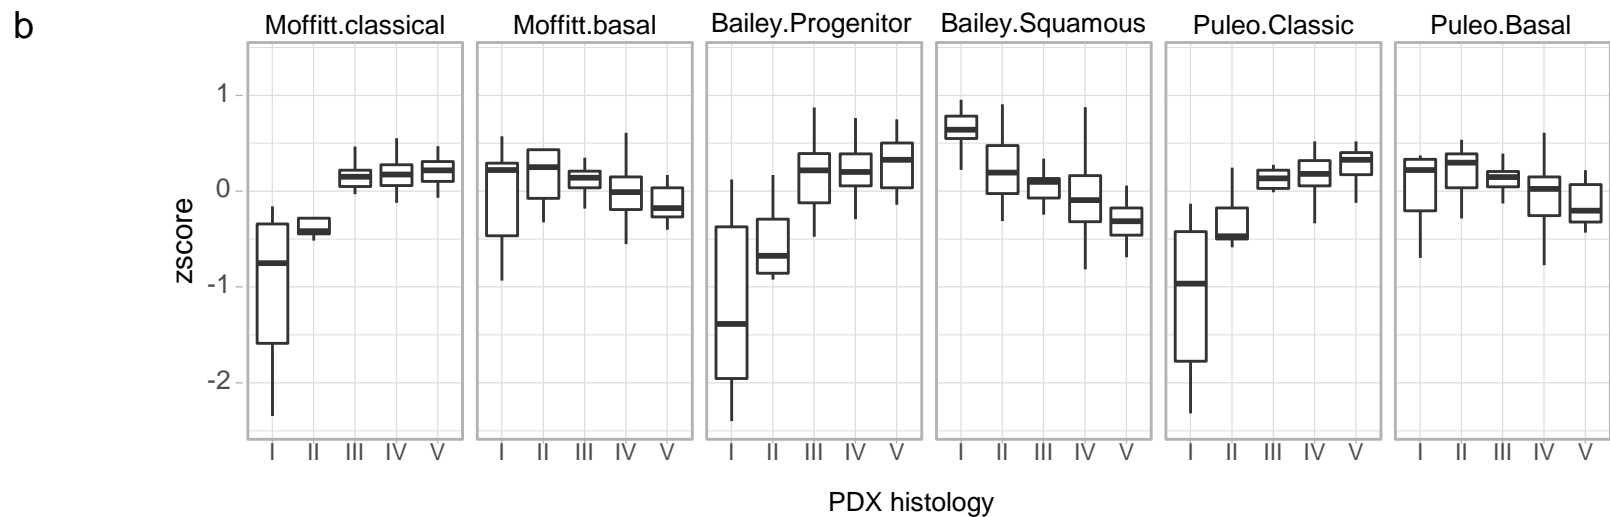

Figure S1
