# Supplementary material for: Establishment of a pancreatic adenocarcinoma molecular gradient (PAMG) that predicts the clinical outcome of pancreatic cancer
Source: PubMed Central journal article supplement — eBioMedicine. 2020 Jul 3;57:102858. doi: 10.1016/j.ebiom.2020.102858 (PMC7334821; doi:10.1016/j.ebiom.2020.102858), 2020-07-03
Supplement: mmc11.pdf [file mmc11.pdf]

| ID       | Gender | Age.at.Diagnosis | Disease.stage    | Type.of.sample         | Sample.localization | Clinical.status.at.censored.date | Differentiation.Score.in.PDX | Histological.differentiation.of.primary.tumor | Survival.in.months | Molecular.gradient |
|----------|--------|------------------|------------------|------------------------|---------------------|----------------------------------|------------------------------|-----------------------------------------------|--------------------|--------------------|
| PDAC091T | male   | 66,68            | metastatic       | EUS-FNA biopsy         | pancreas            | dead                             | 1                            |                                               | 9,25               | -1,0765094         |
| PDAC087T | male   | 57,77            | localized        | surgical resection     | pancreas            | dead                             | 1                            | poorly                                        | 5,28               | -1,073364          |
| PDAC039T | male   | 74,25            | metastatic       | EUS-FNA biopsy         | pancreas            | dead                             | 1                            | poorly                                        | 0,89               | -0,7991813         |
| PDAC004T | male   | 57,87            | metastatic       | EUS-FNA biopsy         | pancreas            | dead                             | 4                            | well                                          | 8,75               | -0,7707272         |
| PDAC089T | female | 52,60            | metastatic       | EUS-FNA biopsy         | hepatic             | dead                             | 1                            |                                               | 3,7                | -0,7543079         |
| PDAC035T | male   | 53,12            | metastatic       | EUS-FNA biopsy         | pancreas            | dead                             | 1                            |                                               | 2,23               | -0,6254481         |
| PDAC001T | female | 67,57            | locally advanced | EUS-FNA biopsy         | pancreas            | dead                             | 2                            |                                               | 3,44               | -0,5566638         |
| PDAC028T | female | 84,28            | locally advanced | EUS-FNA biopsy         | pancreas            | dead                             | 2                            | poorly                                        | 1,21               | -0,5061173         |
| PDAC021T | female | 62,85            | localized        | surgical resection     | pancreas            | dead                             | 1                            | moderate                                      | 6,07               | -0,4565849         |
| PDAC010T | female | 65,60            | metastatic       | intra-operative biopsy | pancreas            | dead                             | 2                            | moderate                                      | 6,16               | -0,4330512         |
| PDAC024T | male   | 45,04            | metastatic       | surgical resection     | pancreas            | dead                             | 4                            | moderate                                      | 11,67              | -0,3850887         |
| PDAC042T | female | 46,22            | metastatic       | intra-operative biopsy | hepatic             | dead                             | 1                            | well                                          | 10,69              | -0,3837523         |

|          |        |       |                  |                        |                |       |   |          |       |            |
|----------|--------|-------|------------------|------------------------|----------------|-------|---|----------|-------|------------|
| PDAC065T | male   | 63,24 | localized        | surgical resection     | pancreas       | alive | 3 | well     | 46,72 | -0,3152261 |
| PDAC003T | female | 65,90 | metastatic       | EUS-FNA biopsy         | pancreas       | dead  | 1 |          | 2,79  | -0,257596  |
| PDAC078T | female | 75,59 | localized        | surgical resection     | pancreas       | dead  | 4 | moderate | 22,75 | -0,2392641 |
| PDAC045T | female | 79,82 | metastatic       | EUS-FNA biopsy         | pancreas       | dead  | 5 |          | 4,16  | -0,2211898 |
| PDAC013T | female | 64,16 | metastatic       | EUS-FNA biopsy         | hepatic        | dead  | 3 |          | 18,07 | -0,2204757 |
| PDAC051T | male   | 75,42 | metastatic       | intra-operative biopsy | carcinomatosis | dead  | 4 |          | 2,03  | -0,1825784 |
| PDAC034T | female | 67,45 | localized        | surgical resection     | pancreas       | alive | 4 | poorly   | 48,2  | -0,1485947 |
| PDAC041T | male   | 53,42 | metastatic       | intra-operative biopsy | hepatic        | alive | 4 | moderate | 44,07 | -0,1431366 |
| PDAC056T | female | 66,21 | localized        | surgical resection     | pancreas       | dead  | 3 | moderate | 14,89 | -0,137433  |
| PDAC054T | male   | 57,83 | locally advanced | EUS-FNA biopsy         | pancreas       | dead  | 2 |          | 12,26 | -0,1242864 |
| PDAC081T | male   | 87,22 | localized        | surgical resection     | pancreas       | alive | 3 | poorly   | 51,7  | -0,107598  |
| PDAC083T | male   | 68,00 | localized        | surgical resection     | pancreas       | dead  | 4 | well     | 16,79 | -0,1068192 |
| PDAC022T | male   | 81,24 | localized        | surgical resection     | pancreas       | dead  | 4 | moderate | 17,25 | -0,0585309 |
| PDAC067T | male   | 68,69 | metastatic       | EUS-FNA biopsy         | pancreas       | dead  | 3 |          | 2,75  | -0,0419868 |
| PDAC074T | male   | 73,68 | localized        | surgical resection     | pancreas       | dead  | 4 | Missing  | 13,48 | -0,0238391 |

|          |        |       |                  |                        |                |       |   |          |       |            |
|----------|--------|-------|------------------|------------------------|----------------|-------|---|----------|-------|------------|
| PDAC020T | male   | 69,01 | localized        | surgical resection     | pancreas       | dead  | 3 | moderate | 34,33 | -0,0163209 |
| PDAC060T | female | 60,89 | locally advanced | EUS-FNA biopsy         | pancreas       | dead  | 4 |          | 2,92  | -0,013136  |
| PDAC016T | male   | 58,29 | localized        | surgical resection     | pancreas       | dead  | 4 | well     | 15,28 | -0,0105023 |
| PDAC061T | female | 76,51 | localized        | surgical resection     | pancreas       | alive | 4 | moderate | 12,33 | 0,005534   |
| PDAC064T | female | 85,81 | localized        | surgical resection     | pancreas       | dead  | 4 | Missing  | 31,7  | 0,0327388  |
| PDAC085T | male   | 72,46 | localized        | surgical resection     | pancreas       | alive | 4 | well     | 64,89 | 0,0450586  |
| PDAC084T | male   | 74,32 | localized        | surgical resection     | pancreas       | dead  | 5 | poorly   | 11,41 | 0,0575784  |
| PDAC073T | male   | 77,83 | metastatic       | intra-operative biopsy | hepatic        | dead  | 5 | well     | 18,79 | 0,0649037  |
| PDAC052T | female | 83,57 | metastatic       | EUS-FNA biopsy         | pancreas       | dead  | 3 |          | 2,26  | 0,06683    |
| PDAC090T | male   | 66,46 | metastatic       | EUS-FNA biopsy         | pancreas       | dead  | 4 |          | 1,25  | 0,070099   |
| PDAC058T | female | 45,45 | metastatic       | intra-operative biopsy | carcinomatosis | dead  | 4 |          | 19,84 | 0,0761145  |
| PDAC015T | male   | 62,85 | localized        | surgical resection     | pancreas       | dead  | 3 | well     | 9,67  | 0,0836553  |
| PDAC066T | male   | 74,98 | metastatic       | EUS-FNA biopsy         | pancreas       | dead  | 3 |          | 6,52  | 0,0881324  |
| PDAC046T | female | 75,84 | metastatic       | intra-operative biopsy | lymph node     | dead  | 4 | well     | 6,3   | 0,0958674  |
| PDAC088T | male   | 68,26 | locally advanced | EUS-FNA biopsy         | pancreas       | dead  | 4 |          | 14,07 | 0,0978266  |

|          |        |       |                  |                        |                |       |   |          |       |           |
|----------|--------|-------|------------------|------------------------|----------------|-------|---|----------|-------|-----------|
| PDAC075T | male   | 75,59 | localized        | surgical resection     | pancreas       | alive | 3 | poorly   | 32,46 | 0,1099596 |
| PDAC033T | male   | 64,78 | locally advanced | EUS-FNA biopsy         | pancreas       | dead  | 5 |          | 26,89 | 0,1222393 |
| PDAC025T | male   | 52,40 | localized        | surgical resection     | pancreas       | dead  | 4 | well     | 18,82 | 0,1362449 |
| PDAC049T | female | 50,98 | localized        | surgical resection     | pancreas       | dead  | 4 | poorly   | 22,95 | 0,1404892 |
| PDAC082T | male   | 41,54 | metastatic       | EUS-FNA biopsy         | pancreas       | dead  | 4 |          | 9,8   | 0,148496  |
| PDAC048T | male   | 70,27 | localized        | surgical resection     | pancreas       | dead  | 4 | moderate | 19,87 | 0,1533562 |
| PDAC072T | male   | 57,81 | localized        | surgical resection     | pancreas       | dead  | 3 | well     | 27,8  | 0,1716717 |
| PDAC032T | male   | 56,24 | metastatic       | EUS-FNA biopsy         | pancreas       | dead  | 4 |          | 3,28  | 0,1863463 |
| PDAC062T | male   | 74,97 | localized        | surgical resection     | pancreas       | alive | 5 | well     | 37,41 | 0,1891264 |
| PDAC053T | female | 74,27 | metastatic       | EUS-FNA biopsy         | pancreas       | dead  | 4 |          | 6,98  | 0,2026926 |
| PDAC050T | female | 59,01 | metastatic       | intra-operative biopsy | carcinomatosis | dead  | 5 |          | 14,69 | 0,2029963 |
| PDAC047T | male   | 60,51 | metastatic       | intra-operative biopsy | hepatic        | dead  | 4 | well     | 3,61  | 0,2209613 |
| PDAC044T | female | 70,68 | localized        | surgical resection     | pancreas       | alive | 4 | moderate | 30,92 | 0,239772  |
| PDAC043T | male   | 80,85 | localized        | surgical resection     | pancreas       | dead  | 5 | moderate | 10,49 | 0,2478358 |
| PDAC059T | female | 68,96 | metastatic       | surgical resection     | pancreas       | dead  | 4 | well     | 5,11  | 0,2502439 |

|          |        |       |            |                        |                |       |   |          |       |           |
|----------|--------|-------|------------|------------------------|----------------|-------|---|----------|-------|-----------|
| PDAC076T | male   | 61,77 | localized  | surgical resection     | pancreas       | dead  | 4 | well     | 13,08 | 0,2599199 |
| PDAC037T | male   | 55,04 | localized  | surgical resection     | pancreas       | alive | 4 | moderate | 45,7  | 0,2634244 |
| PDAC019T | female | 66,87 | localized  | surgical resection     | pancreas       | dead  | 4 | moderate | 36,26 | 0,2674053 |
| PDAC017T | female | 86,12 | localized  | surgical resection     | pancreas       | alive | 4 | moderate | 50,49 | 0,2690655 |
| PDAC079T | male   | 56,99 | localized  | surgical resection     | pancreas       | dead  | 5 | poorly   | 25,74 | 0,2706789 |
| PDAC007T | female | 53,16 | localized  | surgical resection     | pancreas       | dead  | 4 | poorly   | 28,13 | 0,2757066 |
| PDAC031T | male   | 62,71 | metastatic | EUS-FNA biopsy         | hepatic        | dead  | 2 |          | 9,87  | 0,2806448 |
| PDAC029T | male   | 59,56 | localized  | surgical resection     | pancreas       | dead  | 5 | well     | 10,62 | 0,2988537 |
| PDAC008T | male   | 65,17 | metastatic | intra-operative biopsy | carcinomatosis | dead  | 4 |          | 20,16 | 0,3416194 |
| PDAC018T | female | 80,42 | localized  | surgical resection     | pancreas       | alive | 3 | moderate | 58,66 | 0,3596704 |
| PDAC011T | female | 50,11 | localized  | surgical resection     | pancreas       | dead  | 5 | moderate | 29,02 | 0,3666091 |
| PDAC086T | male   | 75,45 | localized  | surgical resection     | pancreas       | dead  | 5 | well     | 34    | 0,3702509 |
| PDAC026T | male   | 78,77 | localized  | surgical resection     | pancreas       | dead  | 4 | well     | 12,66 | 0,4003394 |
| PDAC070T | male   | 65,76 | metastatic | intra-operative biopsy |                | dead  | 4 | well     | 5,44  | 0,4085494 |
| PDAC071T | male   | 67,97 | localized  | surgical resection     | pancreas       | dead  | 5 | poorly   | 20,03 | 0,4214607 |

|          |        |       |                     |                               |          |      |   |        |       |           |
|----------|--------|-------|---------------------|-------------------------------|----------|------|---|--------|-------|-----------|
| PDAC036T | male   | 63,37 | metastatic          | EUS-FNA<br>biopsy             | pancreas | dead | 4 |        | 9,57  | 0,4257343 |
| PDAC057T | male   | 57,17 | locally<br>advanced | intra-<br>operative<br>biopsy | pancreas | dead | 4 |        | 12,56 | 0,4329586 |
| PDAC006T | female | 80,64 | localized           | surgical<br>resection         | pancreas | dead | 4 | poorly | 20,72 | 0,4667511 |
| PDAC030T | male   | 61,22 | metastatic          | EUS-FNA<br>biopsy             | pancreas | dead | 5 |        | 6,79  | 0,4783105 |
