# Supplementary figures and images for: Establishment of a pancreatic adenocarcinoma molecular gradient (PAMG) that predicts the clinical outcome of pancreatic cancer
Source: PubMed Central journal article supplement — eBioMedicine. 2020 Jul 3;57:102858. doi: 10.1016/j.ebiom.2020.102858 (PMC7334821; doi:10.1016/j.ebiom.2020.102858), 2020-07-03

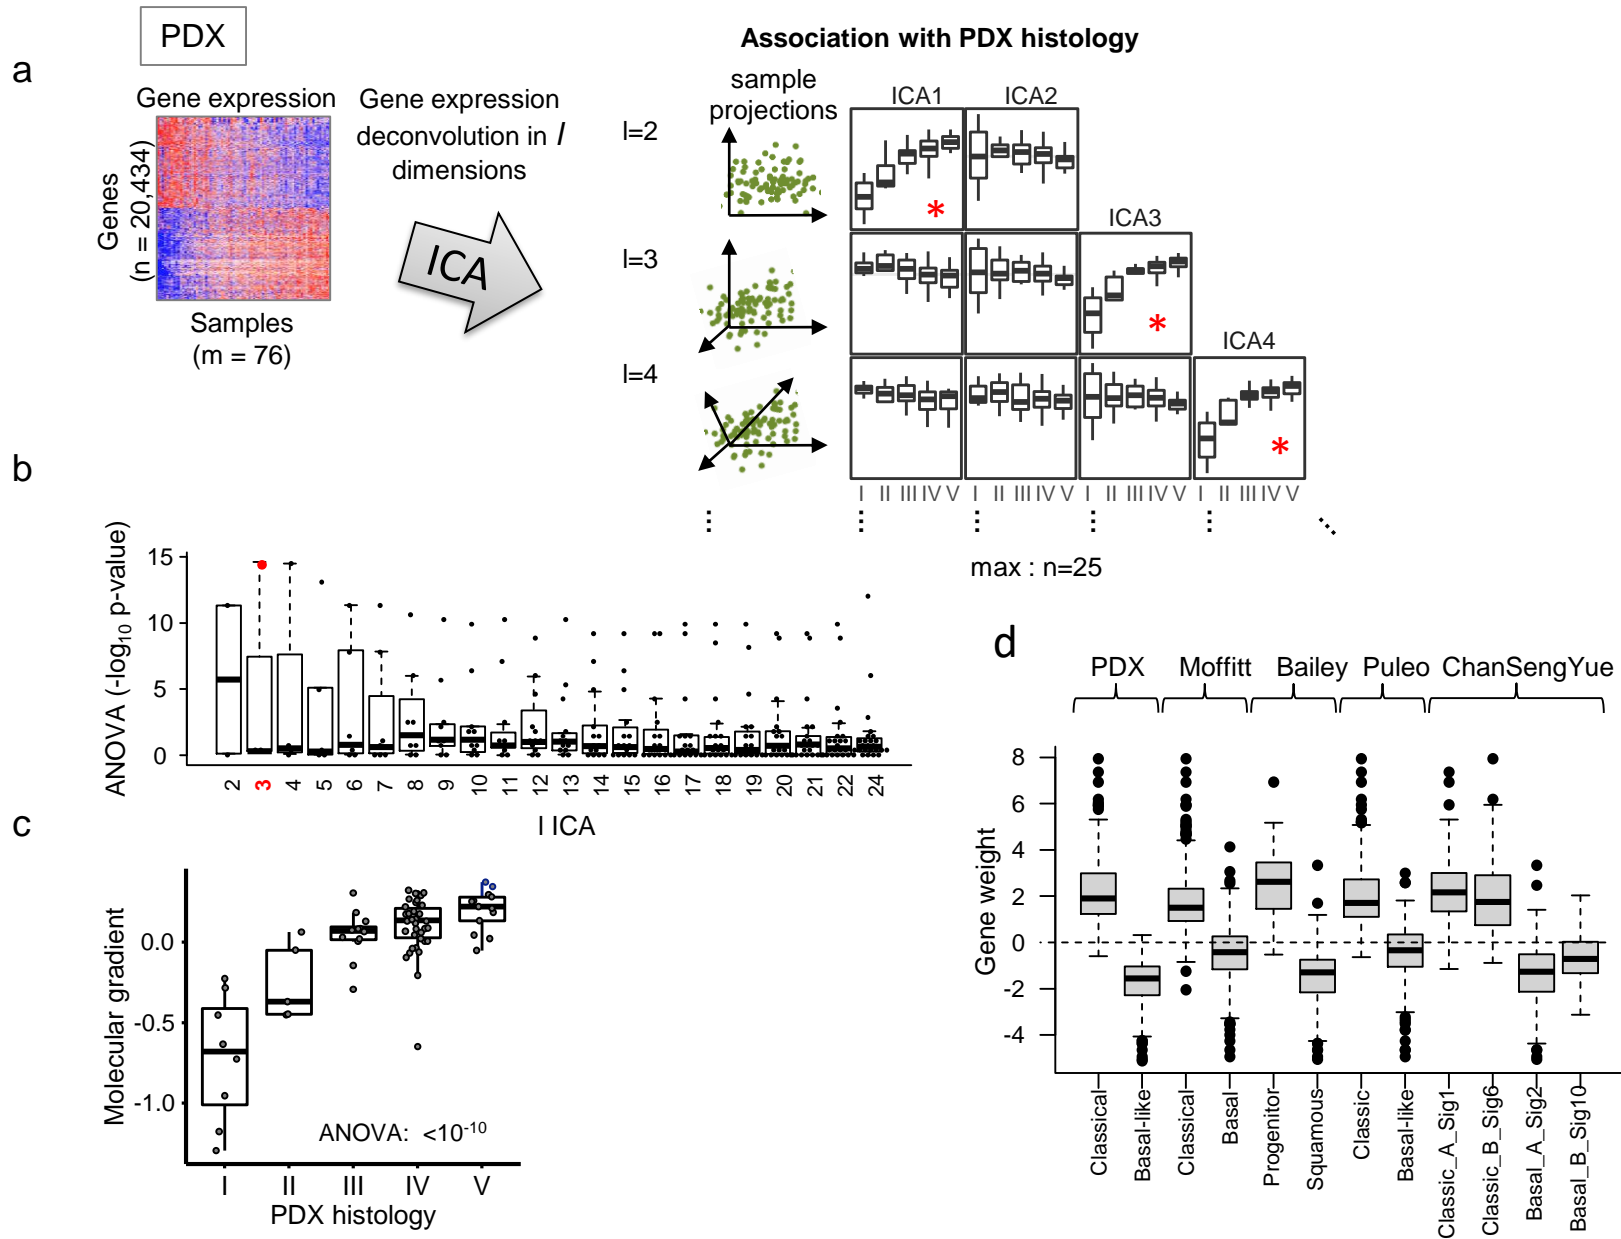

Figure S2

Supplement: mmc4.pdf [file mmc4.pdf]

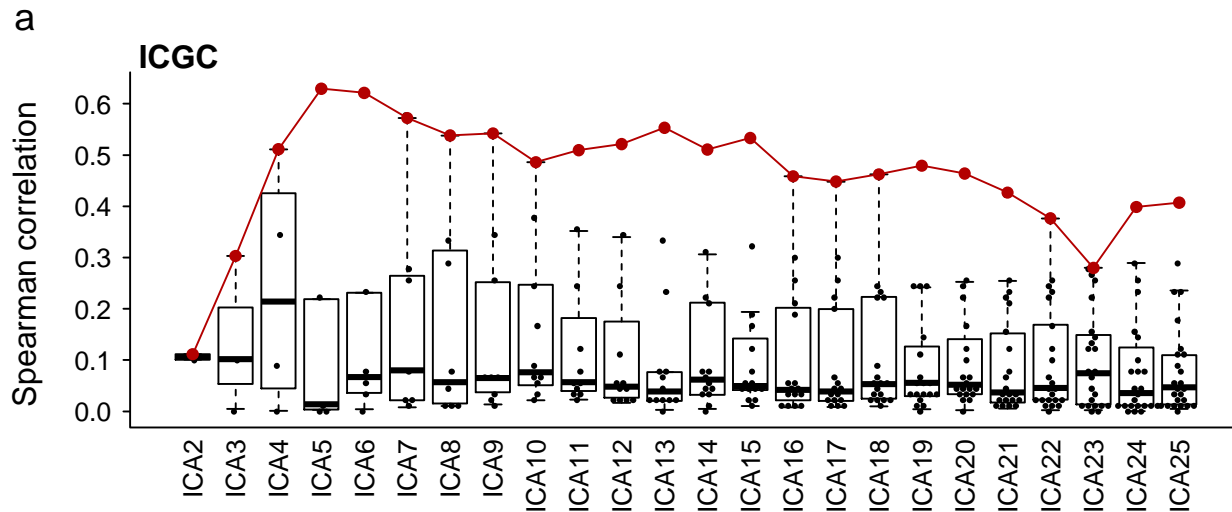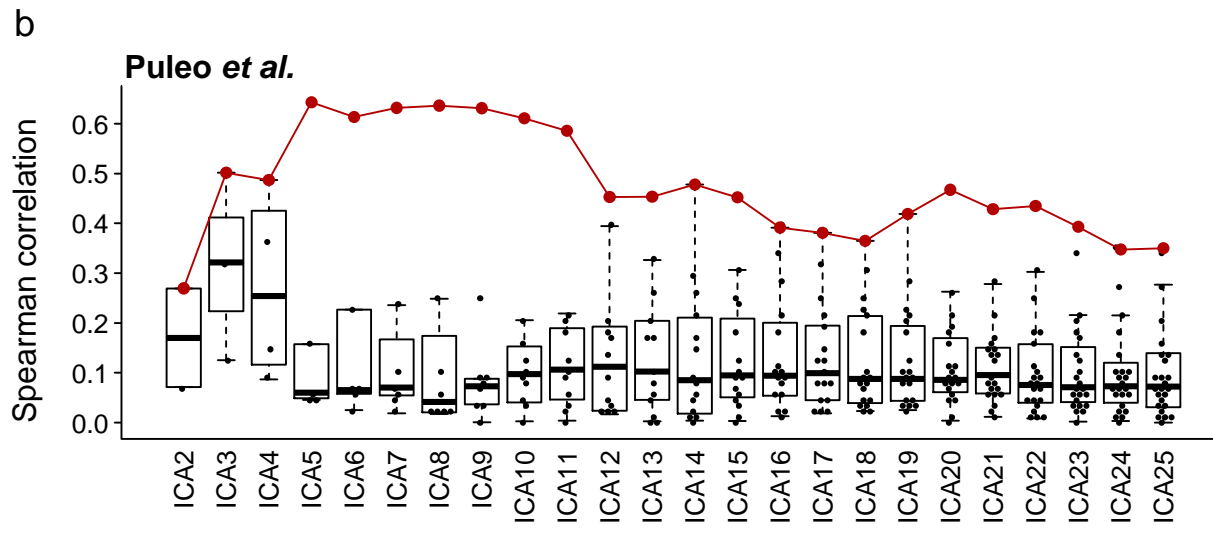

Figure S3

Supplement: mmc5.pdf [file mmc5.pdf]

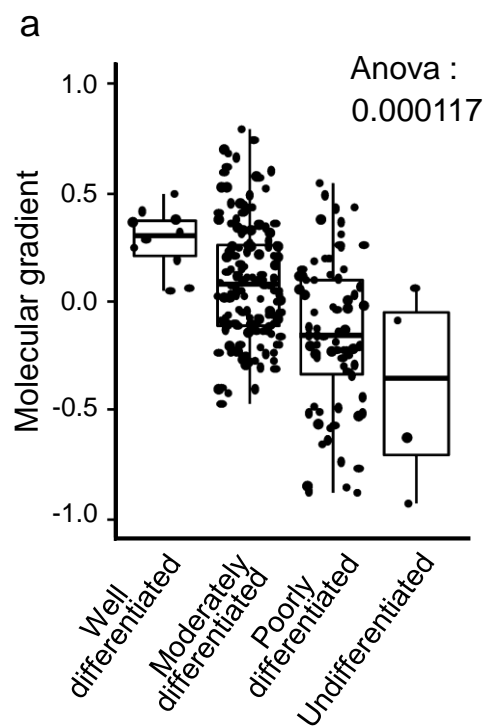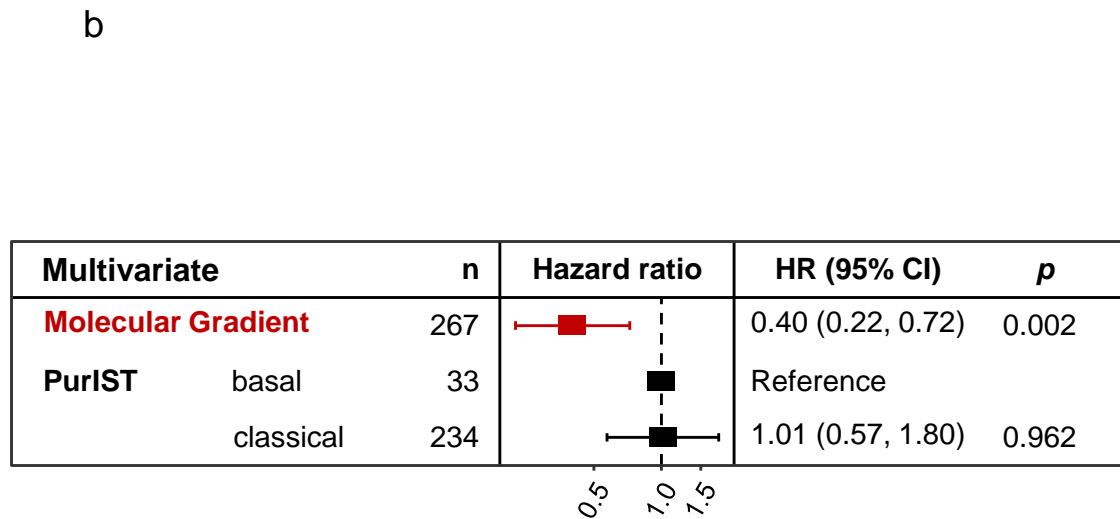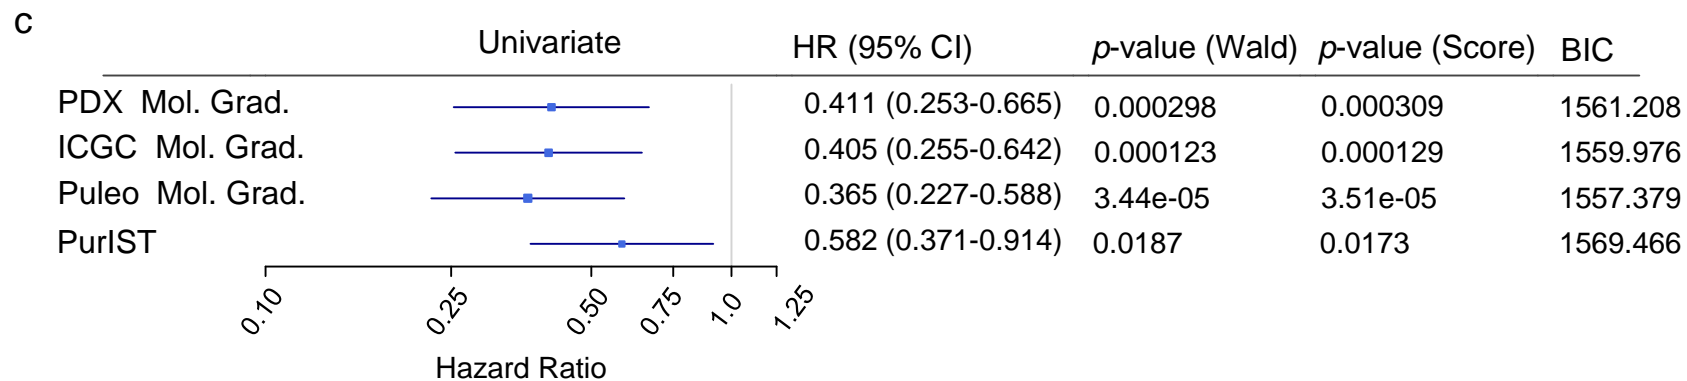

Figure S4

Supplement: mmc6.pdf [file mmc6.pdf]

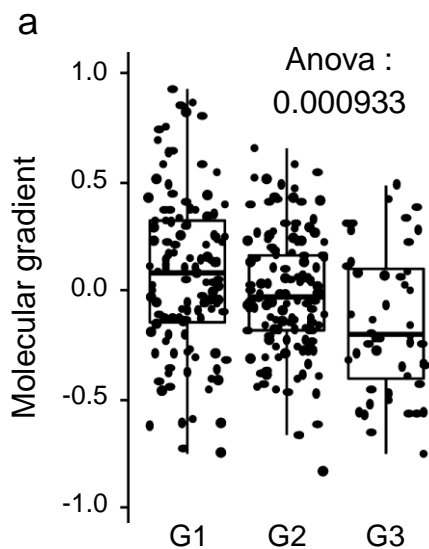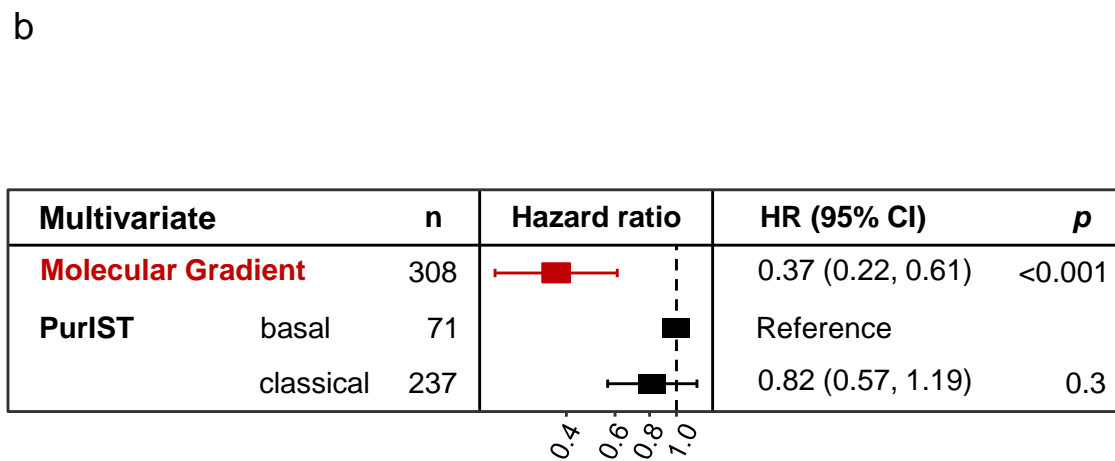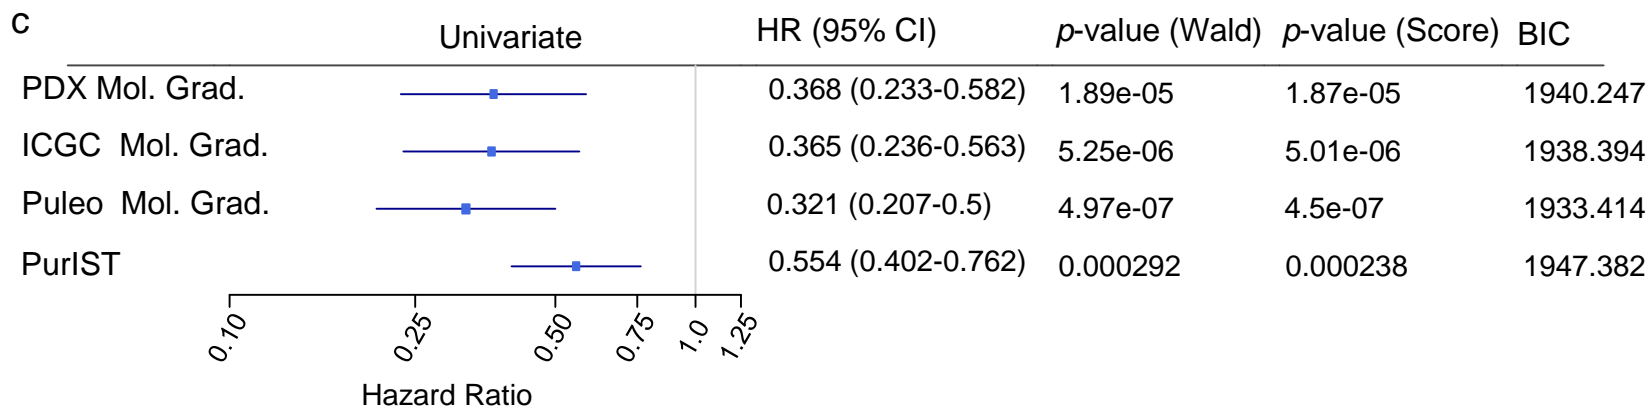

Figure S5

Supplement: mmc7.pdf [file mmc7.pdf]

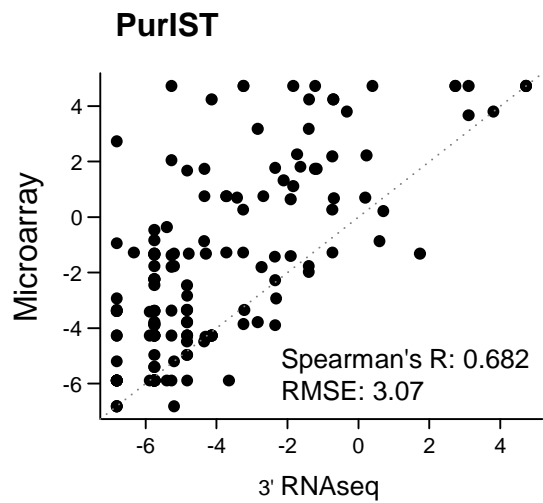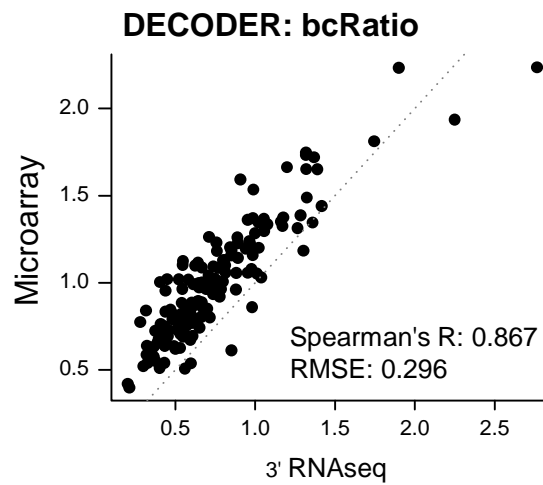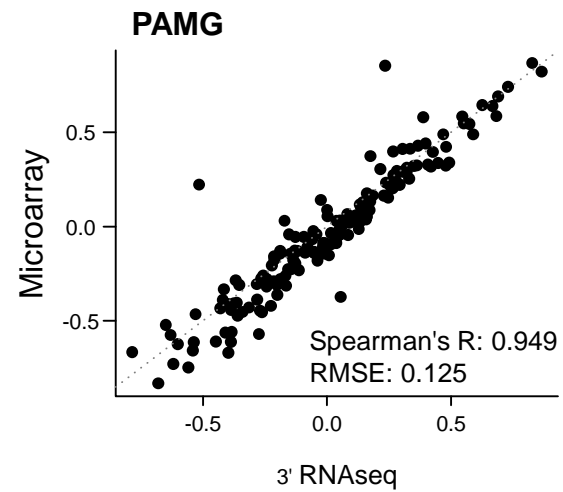

Figure S6

Supplement: mmc8.pdf [file mmc8.pdf]

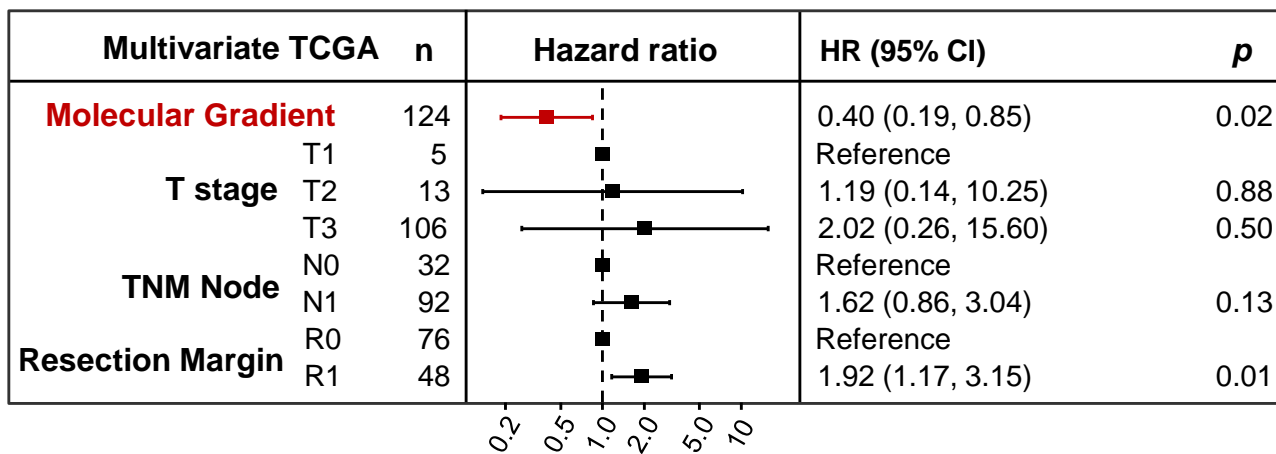

Figure S7

Supplement: mmc9.pdf [file mmc9.pdf]
